# Supplementary material for: Job Demand-Control-Support Model as Related to Objectively Measured Physical Activity and Sedentary Time in Working Women and Men
Source: Int J Environ Res Public Health. 2019 Sep 12;16(18):3370. doi: 10.3390/ijerph16183370 (PMC6765997; doi:10.3390/ijerph16183370)
Supplement: Supplementary file 1 [file ijerph-16-03370-s001.pdf]

**Table S1.** The subscales and items included in the JD-C-S model

| Sub questions and item number | Item text                                                                                   |
|-------------------------------|---------------------------------------------------------------------------------------------|
| Demand                        |                                                                                             |
| 1                             | Does your job require you to work very fast?                                                |
| 2                             | Does your job require you to work very hard?                                                |
| 3                             | Does your job require too great a work effort?                                              |
| 4                             | Do you have sufficient time for all your work tasks?                                        |
| 5                             | Do conflicting demands often occur in your work?                                            |
| Control                       |                                                                                             |
| 6                             | Do you have the opportunity to learn new things in your work?                               |
| 7                             | Does your job require skills?                                                               |
| 8                             | Does your job require creativity?                                                           |
| 9                             | Does your job require doing the same tasks over and over again?                             |
| 10                            | Do you have the possibility to decide for yourself <i>how</i> to carry out your work?       |
| 11                            | Do you have the possibility to decide for yourself <i>what</i> should be done in your work? |
| Support                       |                                                                                             |
| 14                            | There is a quiet and pleasant atmosphere at my place of work                                |
| 15                            | There is good collegiality at work                                                          |
| 16                            | My co-workers (colleagues) are there for me (support me)                                    |
| 17                            | People at work understand that I may have a “bad” day                                       |
| 18                            | I get along well with my supervisors                                                        |
| 19                            | I get along well with my co-workers                                                         |

Each item was scored on a five-point scale from 1 to 5, corresponding to five response categories, for Demands and Control they ranged from “Very rarely” to “Very often”, and for Social support from “Not true at all” to “Completely true” [9, 10].
